# Supplementary material for: Evidence for differential alternative splicing in blood of young boys with autism spectrum disorders
Source: PubMed Central journal article supplement (PMC3846739; doi:10.1186/2040-2392-4-30), 2013-09-04

# Supplementary Figures

Differential Splicing in Autism

Stamova et al.

Figure S1.

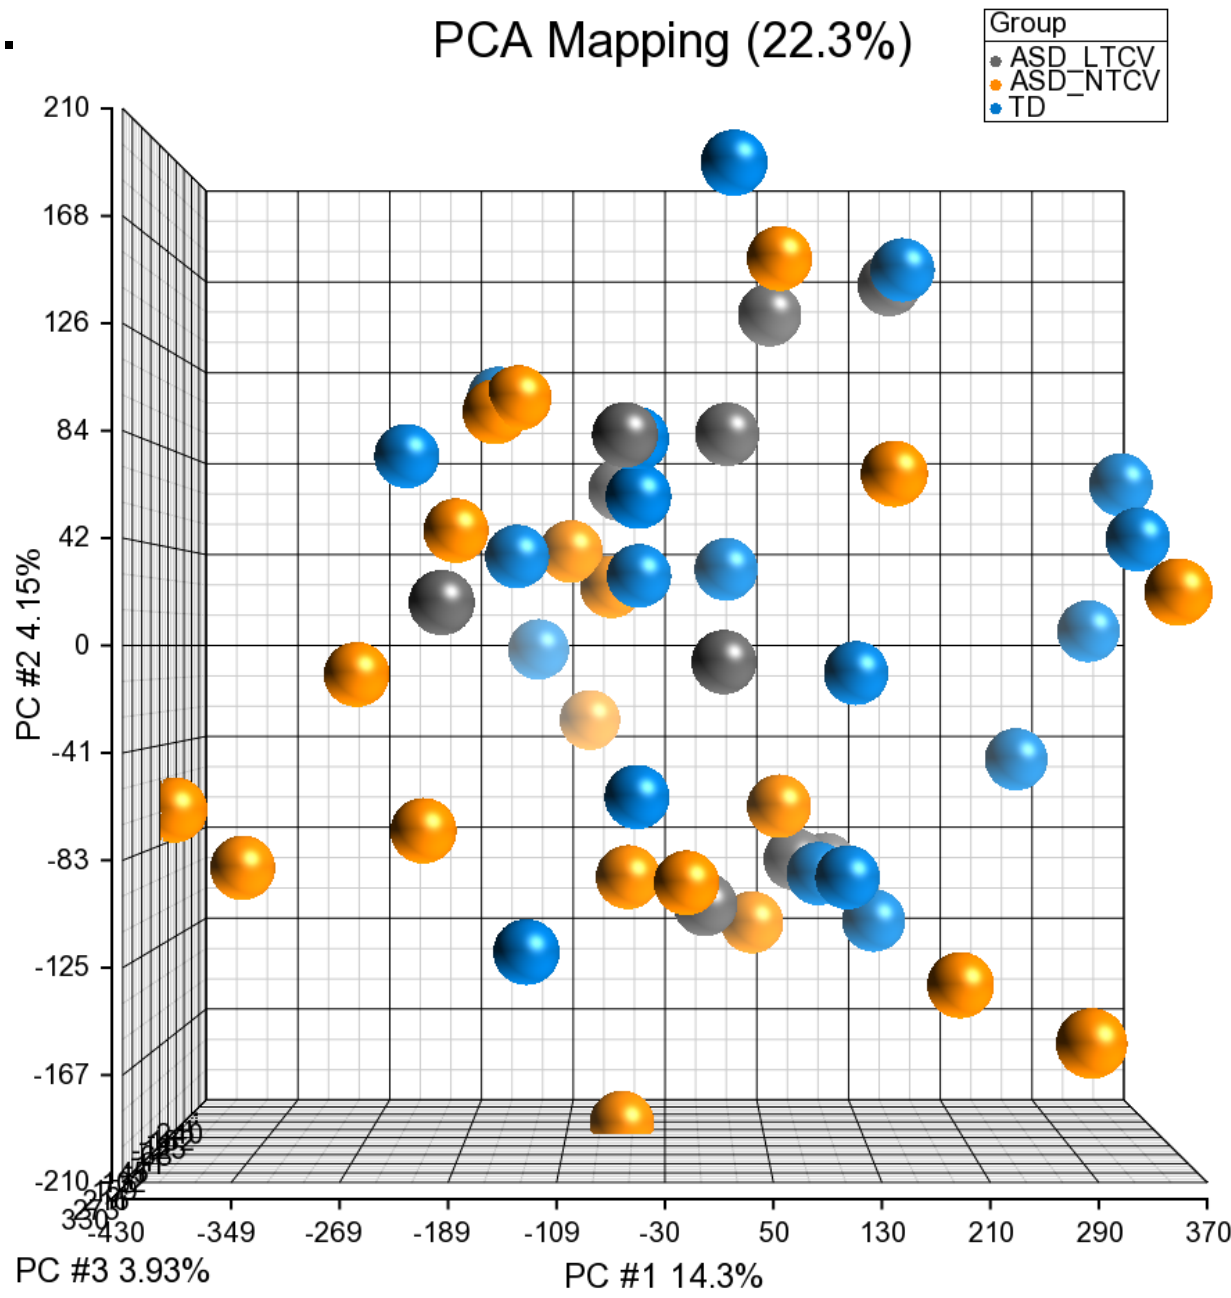

# Figure S2.

Path Designer Network 1

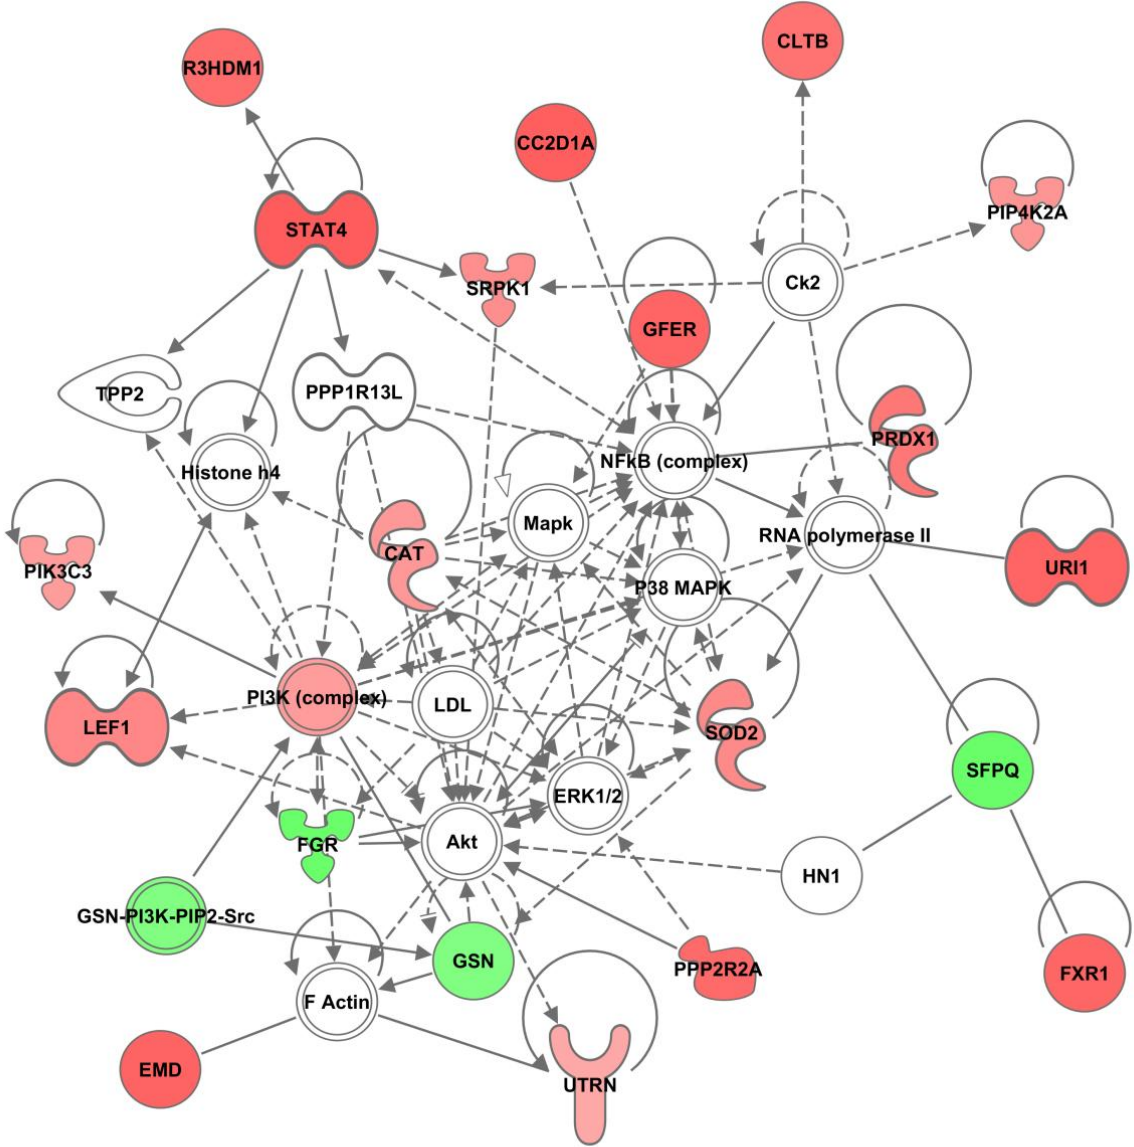

# Figure S3.

Path Designer Network 2

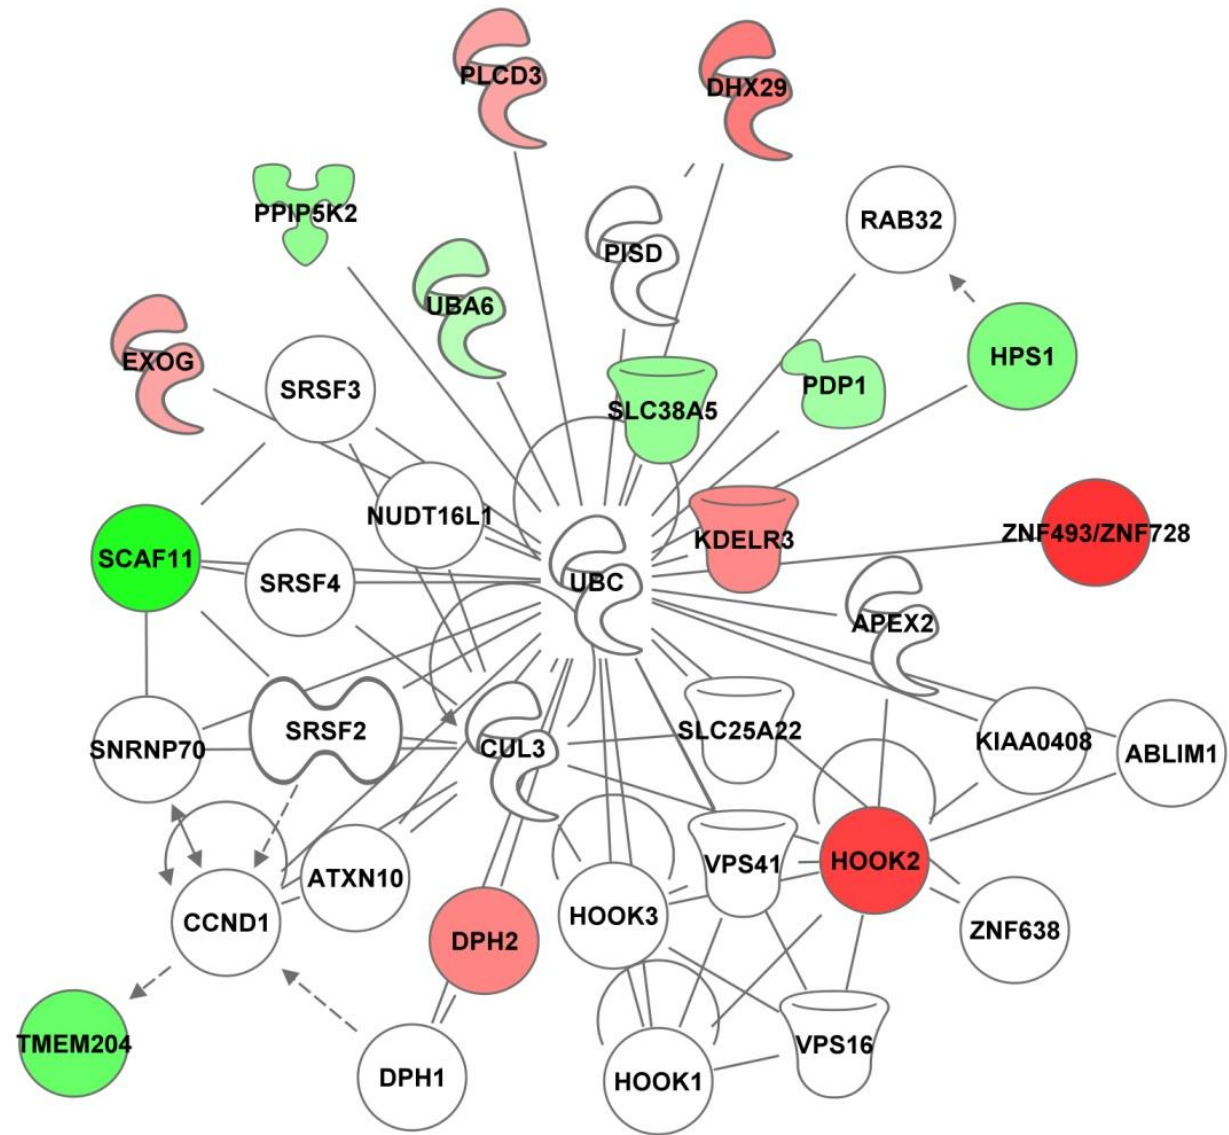

Supplement: 2040-2392-4-30-S1.pdf [file 2040-2392-4-30-S1.pdf]
